# Supplementary material
Source: ML conference proceedings conference paper supplement (https://proceedings.neurips.cc/paper_files/paper/2013/hash/8c19f571e251e61cb8dd3612f26d5ecf-Abstract.html)
Supplement: Supplementary file [file 8c19f571e251e61cb8dd3612f26d5ecf-Supplemental.zip]

---

# Supplemental Document

---

**Dahua Lin**

Toyota Technological Institute at Chicago  
dhlin@ttic.edu

## Abstract

This document provides proofs of theorems presented in the paper, as well as computational details such as the formulas to update components.

## 1 Component Update

This section presents technical details about component updates.

### 1.1 Gaussian Models with Fixed Covariance

Consider the following formulation:

$$\boldsymbol{\theta} \sim \mathcal{N}(\boldsymbol{\mu}_p, \boldsymbol{\Sigma}_p), \quad \text{and} \quad \mathbf{x}_i | \boldsymbol{\theta} \sim \mathcal{N}(\boldsymbol{\theta}, \boldsymbol{\Sigma}_x), \quad \forall i = 1, \dots, n. \quad (1)$$

Here, each sample  $\mathbf{x}$  is generated from a  $d$ -dimensional Gaussian distribution with mean  $\boldsymbol{\theta}$  and a fixed covariance  $\boldsymbol{\Sigma}_x$ , and the  $\boldsymbol{\theta}$  itself is generated from a prior Gaussian with mean  $\boldsymbol{\mu}$  and covariance  $\boldsymbol{\Sigma}_p$ . We can rewrite these distributions in the form of exponential family distributions as follows:

$$p(\boldsymbol{\theta}) = \exp \left( -\frac{1}{2} \boldsymbol{\theta}^T \boldsymbol{\Sigma}_p^{-1} \boldsymbol{\theta} + \boldsymbol{\mu}_p^T \boldsymbol{\Sigma}_p^{-1} \boldsymbol{\theta} - \frac{1}{2} \boldsymbol{\mu}_p^T \boldsymbol{\Sigma}_p^{-1} \boldsymbol{\mu}_p - \frac{1}{2} (d \log(2\pi) + \log |\boldsymbol{\Sigma}_p|) \right), \quad (2)$$

$$F(\mathbf{x} | \boldsymbol{\theta}) = \exp \left( -\frac{1}{2} \boldsymbol{\theta}^T \boldsymbol{\Sigma}_x^{-1} \boldsymbol{\theta} + \boldsymbol{\theta}^T \boldsymbol{\Sigma}_x^{-1} \mathbf{x} - \frac{1}{2} \mathbf{x}^T \boldsymbol{\Sigma}_x^{-1} \mathbf{x} - \frac{1}{2} (d \log(2\pi) + \log |\boldsymbol{\Sigma}_x|) \right). \quad (3)$$

Let  $\mathbf{h}_p = \boldsymbol{\Sigma}_p^{-1} \boldsymbol{\mu}_p$ ,  $mJ_p = \boldsymbol{\Sigma}_p^{-1}$ , and

$$B(\mathbf{h}_p, J_p) = \frac{1}{2} (\mathbf{h}_p^T J_p^{-1} \mathbf{h}_p + d \log(2\pi) - \log |J_p|) = \frac{1}{2} (\boldsymbol{\mu}_p^T \boldsymbol{\Sigma}_p^{-1} \boldsymbol{\mu}_p + d \log(2\pi) + \log |\boldsymbol{\Sigma}_p|).$$

Then Eq.(2) can be rewritten as

$$p(\boldsymbol{\theta} | \mathbf{h}, J) = \exp \left( \mathbf{h}^T \boldsymbol{\theta} + \langle J_p, -\frac{1}{2} \boldsymbol{\theta} \boldsymbol{\theta}^T \rangle - B(\mathbf{h}_p, J_p) \right). \quad (4)$$

In addition, let  $J_x = \boldsymbol{\Sigma}_x^{-1}$ ,  $T(\mathbf{x}) = \boldsymbol{\Sigma}_x^{-1} \mathbf{x} = J_x \mathbf{x}$ ,  $A(\boldsymbol{\theta}) = -\frac{1}{2} \boldsymbol{\theta} \boldsymbol{\theta}^T$ , and

$$b(\mathbf{x}) = \frac{1}{2} (\mathbf{x}^T \boldsymbol{\Sigma}_x^{-1} \mathbf{x} + d \log(2\pi) + \log |\boldsymbol{\Sigma}_x|).$$

We then rewrite Eq.(3) as

$$\begin{aligned} F(\mathbf{x} | \boldsymbol{\theta}) &= \exp \left( \boldsymbol{\theta}^T T(\mathbf{x}) + \langle J_x, A(\boldsymbol{\theta}) \rangle - b(\mathbf{x}) \right) \\ &= \exp \left( \boldsymbol{\theta}^T (\boldsymbol{\Sigma}_x^{-1} \mathbf{x}) + \langle J_x, -\frac{1}{2} \boldsymbol{\theta} \boldsymbol{\theta}^T \rangle - b(\mathbf{x}) \right). \end{aligned} \quad (5)$$

It is not difficult to see from the analysis above that, conditioned on  $\mathbf{x}$ , the posterior distribution of  $\boldsymbol{\theta}$  remains a Gaussian, whose canonical parameters are updated from  $(\mathbf{h}_p, \mathbf{J}_p)$  to  $(\mathbf{h}_p + \mathbf{J}_x \mathbf{x}, \mathbf{J}_p + \mathbf{J}_x)$ .

The log-marginal likelihood of  $\mathbf{x}$  is thus given by

$$\begin{aligned} \log p(\mathbf{x}|\mathbf{h}_p, \mathbf{J}_p) &= \log \int_{\boldsymbol{\theta}} F(\mathbf{x}|\boldsymbol{\theta}) p(\boldsymbol{\theta}|\mathbf{h}, \mathbf{J}) d\boldsymbol{\theta} \\ &= B(\mathbf{h}_p + \mathbf{J}_x \mathbf{x}, \mathbf{J}_p + \mathbf{J}_x) - B(\mathbf{h}_p, \mathbf{J}_p) - b(\mathbf{x}) \\ &= \frac{1}{2}(t_1 + t_2), \end{aligned} \quad (6)$$

with

$$t_1 = (\boldsymbol{\Sigma}_p^{-1} \boldsymbol{\mu}_p + \boldsymbol{\Sigma}_x^{-1} \mathbf{x})^T (\boldsymbol{\Sigma}_p^{-1} + \boldsymbol{\Sigma}_x^{-1})^{-1} (\boldsymbol{\Sigma}_p^{-1} \boldsymbol{\mu}_p + \boldsymbol{\Sigma}_x^{-1} \mathbf{x}) - \boldsymbol{\mu}_p^T \boldsymbol{\Sigma}_p^{-1} \boldsymbol{\mu}_p - \mathbf{x}^T \boldsymbol{\Sigma}_x^{-1} \mathbf{x}, \quad (7)$$

$$t_2 = (d \log(2\pi) - \log |\boldsymbol{\Sigma}_x^{-1} + \boldsymbol{\Sigma}_p^{-1}|) - (d \log(2\pi) + \log |\boldsymbol{\Sigma}_p|) - (d \log(2\pi) + \log |\boldsymbol{\Sigma}_x|). \quad (8)$$

Particularly, these formulas can be further simplified as below:

$$t_1 = -(\mathbf{x} - \boldsymbol{\mu})^T (\boldsymbol{\Sigma}_x + \boldsymbol{\Sigma}_p)^{-1} (\mathbf{x} - \boldsymbol{\mu}), \quad (9)$$

and

$$\begin{aligned} t_2 &= -d \log(2\pi) - (\log |\boldsymbol{\Sigma}_x^{-1} + \boldsymbol{\Sigma}_p^{-1}| + \log |\boldsymbol{\Sigma}_p| + \log |\boldsymbol{\Sigma}_x|) \\ &= -d \log(2\pi) - \log |\boldsymbol{\Sigma}_x (\boldsymbol{\Sigma}_x^{-1} + \boldsymbol{\Sigma}_p^{-1}) \boldsymbol{\Sigma}_p| \\ &= -d \log(2\pi) - \log |\boldsymbol{\Sigma}_x + \boldsymbol{\Sigma}_p|. \end{aligned} \quad (10)$$

Therefore, we have

$$\log p(\mathbf{x}|\mathbf{h}_p, \mathbf{J}_p) = -\frac{1}{2} ((\mathbf{x} - \boldsymbol{\mu}_p)^T (\boldsymbol{\Sigma}_x + \boldsymbol{\Sigma}_p)^{-1} (\mathbf{x} - \boldsymbol{\mu}_p) + d \log(2\pi) + \log |\boldsymbol{\Sigma}_x + \boldsymbol{\Sigma}_p|). \quad (11)$$

This is consistent with the fact with  $\mathbf{x} \sim \mathcal{N}(\boldsymbol{\mu}, \boldsymbol{\Sigma}_p + \boldsymbol{\Sigma}_x)$  when  $\boldsymbol{\theta}$  is marginalized out.

In particular, when  $\boldsymbol{\Sigma}_p = \sigma_p^2 \mathbf{I}$  and  $\boldsymbol{\Sigma}_x = \sigma_x^2 \mathbf{I}$ , we have (with  $\mathbf{h}_p = \sigma_p^{-2} \boldsymbol{\mu}_p$ ):

$$p(\boldsymbol{\theta}|\mathbf{h}_p, \sigma_p^{-2} \mathbf{I}) = \exp \left( \mathbf{h}_p^T \boldsymbol{\theta} - \frac{1}{2} \sigma_p^{-2} \|\boldsymbol{\theta}\|^2 - B(\mathbf{h}_p, \sigma_p^{-2} \mathbf{I}) \right), \quad (12)$$

$$F(\boldsymbol{\theta}|\boldsymbol{\theta}, \sigma_x^{-2} \mathbf{I}) = \exp \left( \boldsymbol{\theta}^T (\sigma_x^{-2} \mathbf{x}) - \frac{1}{2} \sigma_x^{-2} \|\boldsymbol{\theta}\|^2 - b(\mathbf{x}) \right). \quad (13)$$

Here,

$$B(\mathbf{h}_p, \sigma_p^{-2} \mathbf{I}) = \frac{1}{2} (\sigma_p^2 \|\mathbf{h}_p\|^2 + d \log(2\pi \sigma_p^2)), \quad \text{and} \quad b(\mathbf{x}) = \frac{1}{2} (\sigma_x^{-2} \|\mathbf{x}\|^2 + d \log(2\pi \sigma_x^2)). \quad (14)$$

Update of posterior parameter is given by the formulas below:

$$\mathbf{h} \leftarrow \mathbf{h}_p + \sigma_x^{-2} \mathbf{x}, \quad \text{and} \quad \sigma^{-2} \leftarrow \sigma_p^{-2} + \sigma_x^{-2}. \quad (15)$$
